# Supplementary material for: Encapsulated chloride coordinating with two in–in protons of bridgehead amines in an octaprotonated azacryptand
Source: Royal Society of Chemistry journal article supplement (doi:10.1039/b916099j), 2009-01-01
Supplement: b916099j.pdf [file b916099j.pdf]

## Electronic Supplementary Information

Encapsulated chloride coordinating with two *in-in* protons of bridgehead amines in an octaprotonated azacryptand

Musabbir A. Saeed, Frank R. Fronczek and Md. Alamgir Hossain

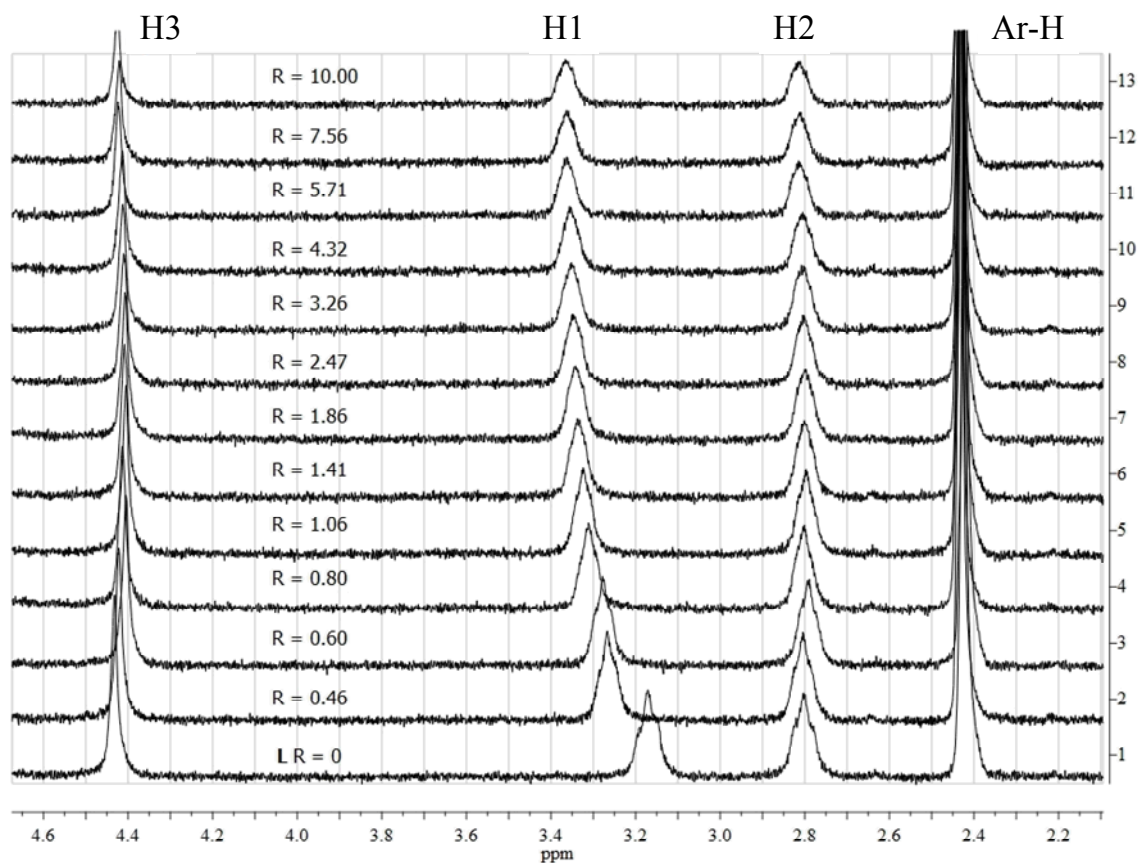

**Figure S1.** <sup>1</sup>H NMR spectra of tosylated salt of **L** (2mM) with the increasing amount of NaCl (20 mM) in D<sub>2</sub>O at pH 2.0. H1 = NCH<sub>2</sub>, H2 = NCH<sub>2</sub>CH<sub>2</sub> and H3 = ArCH<sub>2</sub>.

## Job plot

In order to determine the binding stoichiometry of the complex, a Job plot<sup>1,2</sup> was performed by the <sup>1</sup>H NMR studies of the ligand with varying amount of chloride anion in D<sub>2</sub>O at pH 2.0. Stock solutions (5 mM) of **L** and NaCl were prepared separately in D<sub>2</sub>O and the solution pH was adjusted with a concentrated solution of TsOH and NaOH in D<sub>2</sub>O. Ten NMR samples were prepared with different proportions of the ligand and anion solution so that the total concentration of ([**L**] + [NaCl]) for each sample was 5 mM (**Table S1**). Sodium salt of 3-(trimethylsilyl)propionic-2,2,3,3-*d*<sub>4</sub> acid (TSP) in D<sub>2</sub>O was used as an external reference in a sealed capillary tube. Each NMR sample was run at room temperature. As shown in **Figure S1**, the resonance of H1 (proton adjacent to bridgehead nitrogens) was shifted downfield as the mole fraction of **L** was decreased. The change in the NMR signals of H1 with the mole fraction of **L** is listed in Table S1. The Job plot, shown in Figure S2, was obtained plotting  $\Delta\delta ([\mathbf{L}]/([\mathbf{L}] + [\text{Cl}^-]))$  with  $([\mathbf{L}]/([\mathbf{L}] + [\text{Cl}^-]))$ , indicating a 1:1 complex stoichiometry.

**Table S1:** Data for the Job plot performed by <sup>1</sup>H NMR titration in D<sub>2</sub>O at pH 2.0.

| <b>L</b><br>( $\mu\text{L}$ ) | NaCl<br>( $\mu\text{L}$ ) | [ <b>L</b> ]<br>(mM) | [NaCl]<br>(mM) | [ <b>L</b> ]/([Cl <sup>-</sup> ]+[ <b>L</b> ]) | $\delta$<br>(ppm) | $\delta\Delta$<br>(ppm) | $(\delta\Delta)[\mathbf{L}]/([\text{Cl}^-]+[\mathbf{L}])$ |
|-------------------------------|---------------------------|----------------------|----------------|------------------------------------------------|-------------------|-------------------------|-----------------------------------------------------------|
| 100                           | 900                       | 0.5000               | 4.5000         | 0.1000                                         | 3.3310            | 0.2310                  | 0.0231                                                    |
| 200                           | 800                       | 1.0000               | 4.0000         | 0.2000                                         | 3.3285            | 0.2160                  | 0.0432                                                    |
| 300                           | 700                       | 1.5000               | 3.5000         | 0.3000                                         | 3.3160            | 0.2160                  | 0.0648                                                    |
| 400                           | 600                       | 2.0000               | 3.0000         | 0.4000                                         | 3.2984            | 0.2065                  | 0.0826                                                    |
| 500                           | 500                       | 2.5000               | 2.5000         | 0.5000                                         | 3.2984            | 0.1984                  | 0.0992                                                    |
| 600                           | 400                       | 3.0000               | 2.0000         | 0.6000                                         | 3.2590            | 0.1590                  | 0.0900                                                    |
| 700                           | 300                       | 3.5000               | 1.5000         | 0.7000                                         | 3.1600            | 0.0600                  | 0.0600                                                    |
| 900                           | 100                       | 4.5000               | 0.5000         | 0.9000                                         | 3.1388            | 0.0388                  | 0.0349                                                    |

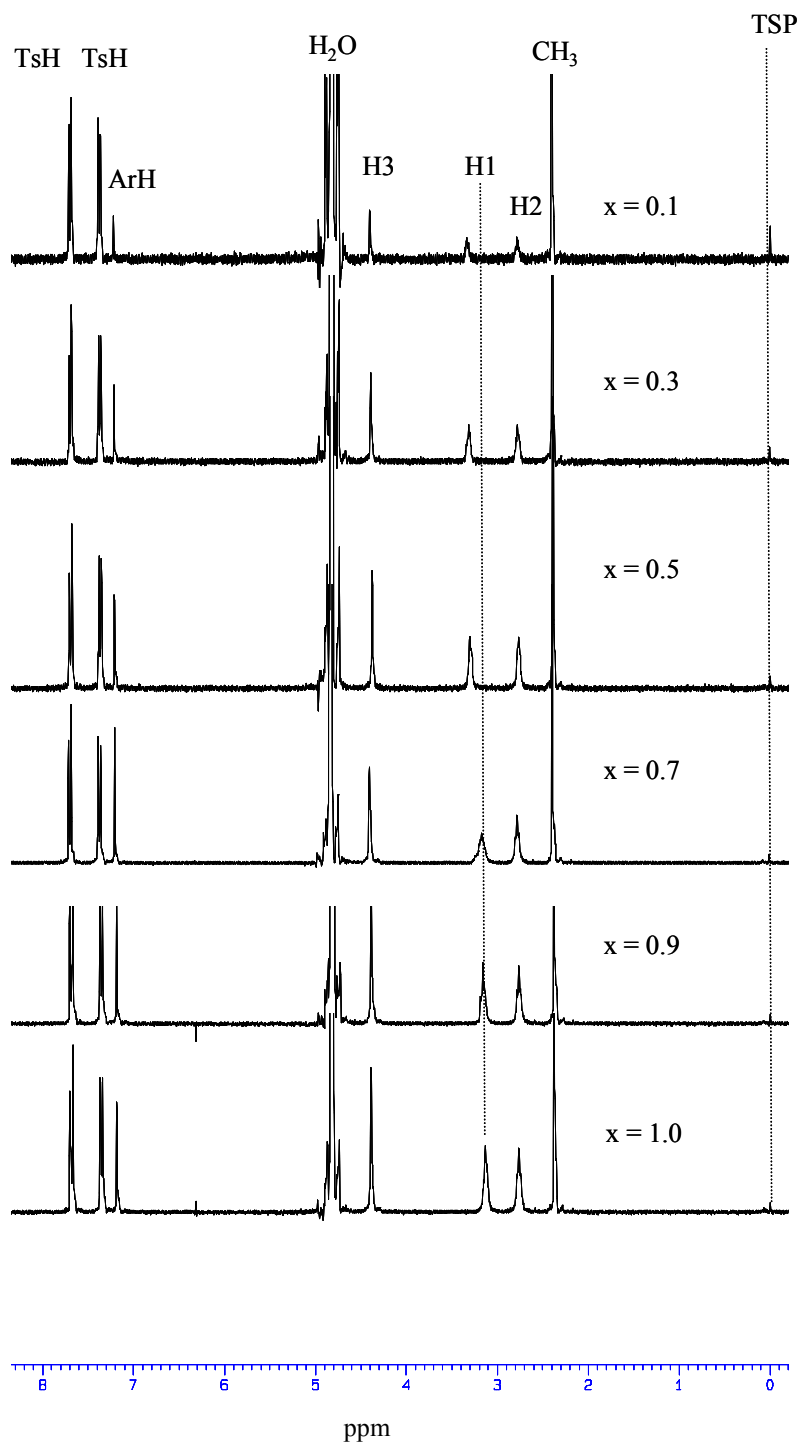

**Figure S2.** <sup>1</sup>H NMR spectra of tosylated salt of **L** with the increasing mole fraction ( $x$ ) in D<sub>2</sub>O at pH 2.0. H1 = NCH<sub>2</sub>, H2 = NCH<sub>2</sub>CH<sub>2</sub> and H3 = ArCH<sub>2</sub>. Total concentration of ([**L**] + [NaCl]) = 5.0 mM.

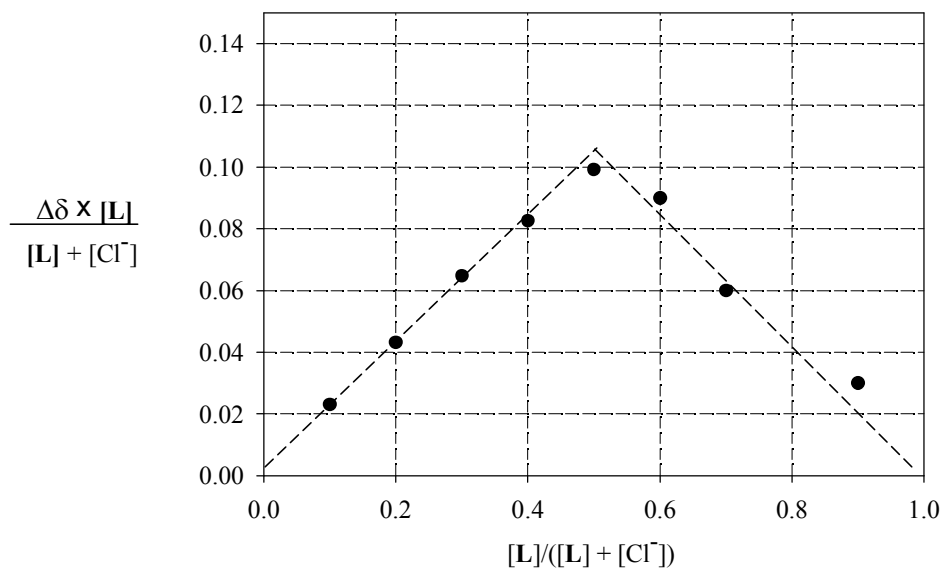

**Figure S3.** Job plot of **L** with NaCl in D<sub>2</sub>O at pH 2.0 showing a maximum at 0.5 mole fraction of **L**.

**References:**

1. K. Choi and A. D. Hamilton, *J. Am. Chem. Soc.*, 2001, **123**, 2456.
2. M. A. Hossain, J. M. Llinares, M. S. Mason, P. Morehouse, D. Powell and K. Bowman-James, *Angew. Chem. Int. Ed.*, 2002, 41, 2335.
